# Supplementary material
Source: MDPI journal article supplement (https://www.mdpi.com/2073-4441/13/18/2549)
Supplement: s1 [file s1]

## Supplementary Material

Title: **Spoiled for Choice during Cold Season? Habitat Use and Potential Impacts of the Invasive *Silurus glanis* L. in a Deep, Large and Oligotrophic Lake (Lake Maggiore, North Italy)**

Authors: **Vanessa De Santis \***, **Pietro Volta**

CNR-IRSA, Largo Tonolli 50, 28922 Verbania Pallanza, VB, Italy; [vanessa.desantis@irsa.cnr.it](mailto:vanessa.desantis@irsa.cnr.it) (V.D.S.); [pie-tro.volta@cnr.it](mailto:pie-tro.volta@cnr.it) (P.V.)

\* Correspondence: [vanessa.desantis@irsa.cnr.it](mailto:vanessa.desantis@irsa.cnr.it)

Journal: **Water**

**Figure S1.** Distribution of *Silurus glanis* in the main Italian hydrological basins. Highlighted in red where the species is established: 1 = Po; 2 = Adige; 3 = Tagliamento; 4 = Isonzo; 5 = Sile; 6 =Brenta; 7 =Canalbianco; 8 = Serchio; 9 = Reno; 10 = Arno; 11 = Ombrone; 12 = Tevere; 13 = Aterno-Pescara;14 =Volturno.

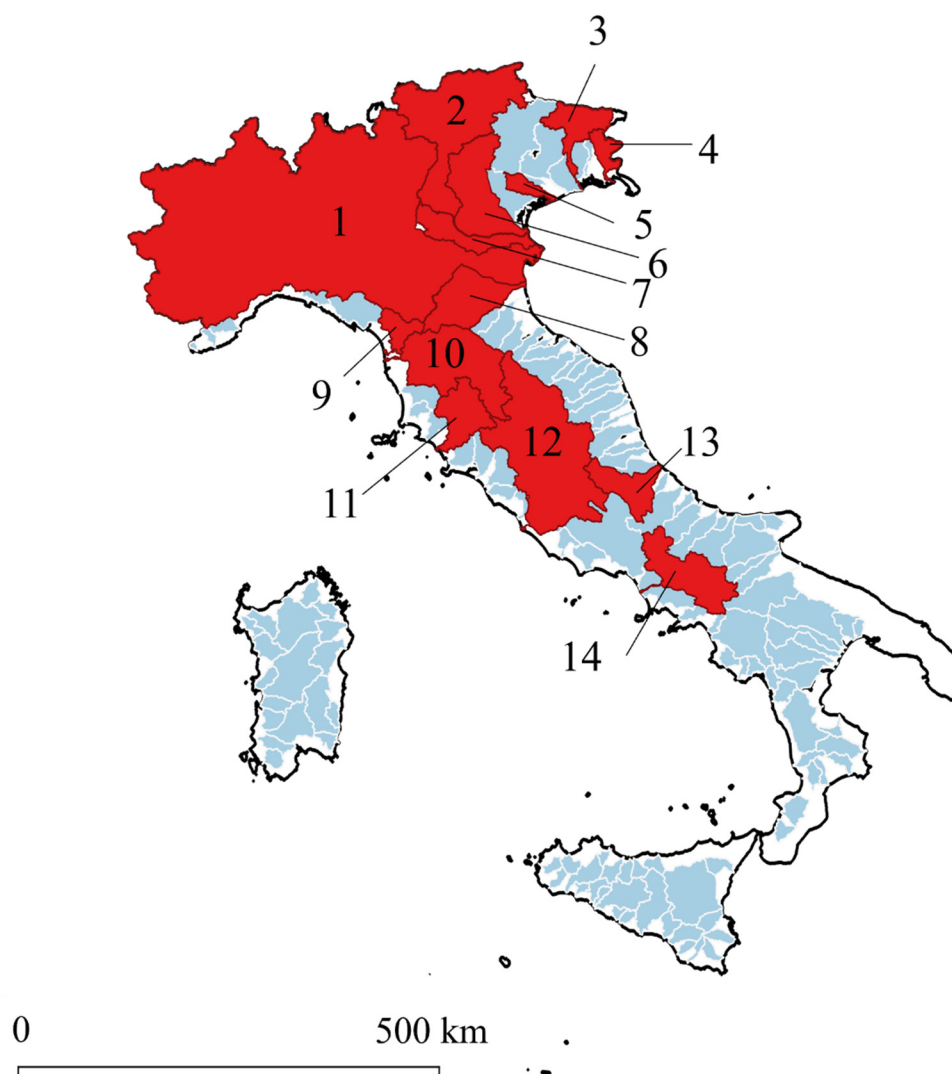

**Table S1.** Linear regression parameters of length-weight relations (LWRs) of prey fish species calculated from an internal database of length and weight of fish species sampled in different Italian lakes from 2007 to 2014.

| Species                                                     | Lakes                                                                                                                                    | n    | a                 | b                | R <sup>2</sup> | F            | p Value |
|-------------------------------------------------------------|------------------------------------------------------------------------------------------------------------------------------------------|------|-------------------|------------------|----------------|--------------|---------|
| <i>Silurus glanis</i>                                       | L. Sirio, L. Varese and L. Maggiore                                                                                                      | 28   | -2.32 (2.50–2.14) | 3.07 (2.97–3.18) | 0.99           | 3547.0       | <0.001  |
| <i>Alosa agone</i>                                          | L. Iseo, L. Como, L. Maggiore, L. Mergozzo, L. Garda                                                                                     | 757  | -2.04 (2.07–2.0)  | 2.94 (2.91–2.97) | 0.98           | 37,867.5     | <0.001  |
| <i>Coregonus</i> sp.                                        | L. Iseo, L. Como, L. Maggiore, L. Mezzola                                                                                                | 347  | -2.36 (2.40–2.31) | 3.18 (3.14–3.21) | 0.99           | 29,485.8     | <0.001  |
| <i>Rutilus rutilus</i>                                      | L. Varese, L. Mergozzo, L. Maggiore, L. Como, L. Ghirla, L. Caldaro                                                                      | 507  | -2.26 (2.29–2.22) | 3.24 (3.21–3.27) | 0.99           | 46,536.4     | <0.001  |
| <i>Perca fluviatilis</i>                                    | L. Viverone, L. Mergozzo, L. Varese, L. Maggiore, L. Garda, L. Como, L. Candia, L. Iseo, L. Idro                                         | 497  | -1.99 (2.03–1.96) | 3.04 (3.00–3.06) | 0.98           | 28,015.8     | <0.001  |
| <i>Sander lucioperca</i>                                    | L. Viverone, L. Mergozzo, L. Varese, L. Maggiore, L. Como, L. Candia, L. Caldaro, L. Mezzola                                             | 319  | -2.3 (2.4–2.6)    | 3.15 (3.1–3.2)   | 0.97           | 11,610.24637 | <0.001  |
| <i>Scardinius erythrophthalmus</i> / <i>S. hesperidicus</i> | L. Viverone, L. Mergozzo, L. Varese, L. Maggiore, L. Garda, L. Como, L. Candia, L. Iseo, L. Idro, L. Avigliana, L. Montorfano, L. Ghirla | 1666 | -2.07 (2.1–2.04)  | 3.13 (3.1–3.15)  | 0.97           | 59,664.37102 | <0.001  |
| <i>Squalius squalus</i>                                     | L. Iseo, L. Garda, L. Ghirla, L. Como, L. Maggiore, L. Mergozzo, L. Mezzola                                                              | 103  | -2.01 (2.14–1.88) | 3.02 (2.91–3.12) | 0.97           | 3056.512991  | <0.001  |
| <i>Cottus gobio</i>                                         | L. Mezzola, L. Maggiore, L. Garda, L. Como                                                                                               | 27   | -1.62 (2.22–1.02) | 2.62 (1.94–3.29) | 0.72           | 63.67141701  | <0.001  |
| <i>Lota lota</i>                                            | L. Iseo, L. Idro, L. Garda, L. Maggiore, L. Como, L. Mergozzo, L. Mezzola                                                                | 91   | -2.38 (2.49–2.28) | 3.17 (3.09–3.25) | 0.99           | 6523.169622  | <0.001  |

**Table S2.** Feeding intensity (as Vacuity index,  $V_i\%$ ) and amount of food ingested (as Fullness index,  $F_i\%$ ) together with number and biomass of prey at each sampling site and for each of the two size classes (Class I < 100 cm and Class II > 101 cm) per month of capture of catfish caught in littoral and pelagic habitat of L. Maggiore.

| Site | Habitat  | Size Class | Month | N <sub>stomach</sub> | $V_i\%$ | Mean $F_i\%$ $\pm$ 95% CI | Total N <sub>prey</sub> | Mean N <sub>prey</sub> | Total W (kg) | Mean W (g) $\pm$ 95% CI |
|------|----------|------------|-------|----------------------|---------|---------------------------|-------------------------|------------------------|--------------|-------------------------|
| 1    | Littoral | Class I    | Nov   | 3                    | 0.0     | 4.72 $\pm$ 12.81          | 3                       | 1.00 $\pm$ 0.00        | 0.44         | 146.3 $\pm$ 474.3       |
|      |          |            | Dec   | 15                   | 25.0    | 5.30 $\pm$ 2.78           | 61                      | 4.07 $\pm$ 2.90        | 4.2          | 279.8 $\pm$ 153.5       |
|      |          |            | Jan   | 6                    | 14.3    | 4.04 $\pm$ 1.46           | 27                      | 4.50 $\pm$ 1.28        | 1.08         | 179.8 $\pm$ 44.3        |
|      | Pelagic  | Class II   | Nov   | 2                    | 0.0     | 6.88 $\pm$ 49.17          | 7                       | 3.50 $\pm$ 6.35        | 0.99         | 495.5 $\pm$ 3005        |
|      |          |            | Jan   | 8                    | 11.1    | 4.54 $\pm$ 4.06           | 29                      | 3.62 $\pm$ 2.36        | 2.71         | 339.4 $\pm$ 285.7       |
|      |          | Class I    | Nov   | 7                    | 44.2    | 6.45 $\pm$ 3.00           | 25                      | 3.57 $\pm$ 1.59        | 2.61         | 373.0 $\pm$ 189.8       |
|      |          |            | Dec   | 1                    | 0.0     | 4.35                      | 3                       |                        | 0.27         |                         |
|      |          | Class II   | Nov   | 20                   | 9.1     | 4.06 $\pm$ 0.99           | 56                      | 2.80 $\pm$ 0.77        | 8.85         | 442.8 $\pm$ 88.5        |
|      |          |            | Dec   | 11                   | 31.3    | 4.64 $\pm$ 1.38           | 31                      | 2.82 $\pm$ 0.41        | 6.92         | 629.1 $\pm$ 257.8       |
|      |          |            | Jan   | 6                    | 40      | 3.21 $\pm$ 1.83           | 12                      | 2.00 $\pm$ 0.94        | 1.96         | 326.3 $\pm$ 199.2       |
| 2    | Littoral | Class I    | Jan   | 10                   | 37.5    | 6.09 $\pm$ 2.80           | 48                      | 4.80 $\pm$ 2.47        | 2.75         | 275 $\pm$ 180           |
|      |          | Class II   | Nov   | 5                    | 37.5    | 5.47 $\pm$ 5.09           | 13                      | 2.6 $\pm$ 1.42         | 2.35         | 469.8 $\pm$ 350.6       |
|      |          |            | Dec   | 4                    | 33.3    | 5.51 $\pm$ 1.20           | 17                      | 4.25 $\pm$ 5.42        | 2.04         | 510.7 $\pm$ 316.4       |
|      |          |            | Jan   | 1                    | 0.0     | 6.2                       | 2                       |                        | 0.63         |                         |
|      | Pelagic  | Class I    | Nov   | 2                    | 83.3    | 4.38 $\pm$ 25.7           | 3                       | 1.50 $\pm$ 6.35        | 0.57         | 287.5 $\pm$ 1734.4      |
|      |          |            | Dec   | 14                   | 0.0     | 4.00 $\pm$ 1.26           | 26                      | 1.86 $\pm$ 0.64        | 3.05         | 218.2 $\pm$ 75.2        |
|      |          |            | Jan   | 6                    | 0.0     | 2.70 $\pm$ 1.90           | 18                      | 3.00 $\pm$ 1.99        | 0.9          | 149.3 $\pm$ 85.1        |
|      |          | Class II   | Nov   | 21                   | 8.7     | 2.74 $\pm$ 1.62           | 48                      | 2.29 $\pm$ 0.61        | 5.47         | 260.3 $\pm$ 110.7       |
|      |          |            | Dec   | 5                    | 37.5    | 3.44 $\pm$ 3.50           | 16                      | 3.20 $\pm$ 1.36        | 1.52         | 304.2 $\pm$ 290.1       |
|      |          |            | Jan   | 2                    | 0.0     | 3.95 $\pm$ 34.3           | 5                       | 2.5 $\pm$ 19.06        | 0.93         | 464.5 $\pm$ 4123.2      |
| 3    | Littoral | Class I    | Nov   | 2                    | 0.0     | 3.26 $\pm$ 6.35           | 4                       | 2.00 $\pm$ 0.00        | 0.42         | 209 $\pm$ 406.6         |
|      |          |            | Dec   | 9                    | 10.0    | 5.36 $\pm$ 2.16           | 41                      | 4.56 $\pm$ 3.63        | 2.86         | 318.1 $\pm$ 146.1       |
|      |          |            | Jan   | 8                    | 0.0     | 9.32 $\pm$ 9.48           | 36                      | 4.50 $\pm$ 3.43        | 3.57         | 446 $\pm$ 433.5         |
|      | Pelagic  | Class II   | Nov   | 6                    | 0.0     | 6.49 $\pm$ 3.11           | 18                      | 3.00 $\pm$ 3.11        | 3.1          | 516 $\pm$ 241.5         |
|      |          | Class I    | Nov   | 1                    | 0.0     | 3.38                      | 4                       |                        | 0.22         |                         |
|      |          |            | Dec   | 3                    | 25.0    | 2.48 $\pm$ 4.48           | 8                       | 2.67 $\pm$ 3.69        | 1.16         | 386.3 $\pm$ 690.7       |
|      |          | Class II   | Nov   | 4                    | 33.3    | 3.22 $\pm$ 1.51           | 20                      | 5.00 $\pm$ 7.69        | 1.79         | 448.2 $\pm$ 212.9       |
|      |          |            | Dec   | 3                    | 25.0    | 2.48 $\pm$ 4.48           | 8                       | 2.67 $\pm$ 3.69        | 1.16         | 386.3 $\pm$ 690.7       |

**Table S3.** List of the 12 prey species composing catfish diet and relative frequency of occurrence (FO%), numeric (N%) and biomass (W%) abundance for each catfish size class in each habitat.

| Species                        | Pelagic          |       |      |                   |      |      | Littoral         |      |      |                   |      |      |
|--------------------------------|------------------|-------|------|-------------------|------|------|------------------|------|------|-------------------|------|------|
|                                | Class I (N = 31) |       |      | Class II (N = 72) |      |      | Class I (N = 53) |      |      | Class II (N = 26) |      |      |
|                                | %FO              | %N    | %W   | %FO               | %N   | %W   | %FO              | %N   | %W   | %FO               | %N   | %W   |
| <i>Coregonus</i> sp.           | 80.6             | 54.43 | 62.2 | 54.2              | 46.9 | 66.2 | 7.5              | 1.8  | 4.7  | 23.1              | 15.1 | 16.8 |
| <i>Alosa agone</i>             | 32.3             | 34.2  | 28.7 | 50.0              | 50.0 | 30.5 | -                | -    | -    | -                 | -    | -    |
| <i>Rutilus rutilus</i>         | 9.7              | 11.4  | 9.1  | 5.6               | 3.1  | 3.30 | 37.7             | 15.9 | 18.3 | 23.1              | 12.8 | 8.30 |
| <i>Perca fluviatilis</i>       | -                | -     | -    | -                 | -    | -    | 37.7             | 21.4 | 11.4 | 23.1              | 12.8 | 3.7  |
| <i>Sander lucioperca</i>       | -                | -     | -    | -                 | -    | -    | 5.7              | 0.9  | 4.7  | 7.7               | 4.7  | 15.6 |
| <i>Scardinius hesperidicus</i> | -                | -     | -    | -                 | -    | -    | 3.8              | 0.9  | 2.7  | 7.7               | 4.7  | 11.5 |
| <i>Squalius squalus</i>        | -                | -     | -    | -                 | -    | -    | 1.9              | 0.5  | 3.0  | -                 | -    | -    |
| <i>Silurus glanis</i>          | -                | -     | -    | -                 | -    | -    | 3.8              | 0.9  | 13.7 | 19.2              | 5.8  | 33.1 |
| <i>Cottus gobio</i>            | -                | -     | -    | -                 | -    | -    | 1.9              | 0.9  | 0.15 | -                 | -    | -    |
| <i>Lota lota</i>               | -                | -     | -    | -                 | -    | -    | 1.9              | 0.5  | 1.21 | 3.8               | 1.2  | 1.35 |
| <i>Faxonius limosus</i>        | -                | -     | -    | -                 | -    | -    | 58.5             | 50.9 | 38.6 | 50.0              | 41.9 | 15.8 |
| <i>Procambarus clarkii</i>     | -                | -     | -    | -                 | -    | -    | 1.9              | 0.9  | 1.5  | 3.8               | 1.2  | 0.54 |
